# Supplementary material for: The Effects of Coriandrum sativum L. and Cucurbita pepo L. against Gastrointestinal Parasites in Swine: An In Vivo Study
Source: MDPI journal article supplement (doi:10.3390/microorganisms11051230), 2023-05-06
Supplement: s1 [file s1]

## Supplementary Data

**Table S1.** Ontologies/pathogens, diseases, medicinal plants and chemical compounds used in experiment.

| Traits                      | ATOL*, AHOL**, OPL***, IPNI****, and ChEBI***** |              |
|-----------------------------|-------------------------------------------------|--------------|
|                             | References                                      |              |
| Parasite load traits        | Parasite Oocysts (OPG)                          | Oocyst Stage |
|                             | Parasite Cysts                                  | Cyst Stage   |
|                             | Parasite Eggs (EPG)                             | Egg Stage    |
| Parasite used               | <i>Eimeria</i> spp.                             | AHOL_0004070 |
|                             | <i>Balantiodides coli</i>                       | AHOL_0004016 |
|                             | <i>Ascaris suum</i>                             | AHOL_0004179 |
|                             | <i>Trichuris suis</i>                           | AHOL_0004186 |
|                             | <i>Oesophagostomum</i> spp.                     | AHOL_0004181 |
|                             | <i>Cryptosporidium</i> spp.                     | AHOL_0004175 |
| Disease description         | Ascariidiosis                                   | AHOL_0005382 |
|                             | Coccidiosis                                     | AHOL_0005374 |
|                             | Cryptosporidiosis                               | AHOL_0005377 |
| Medicinal plants used       | <i>Coriandrum sativum</i> L.                    | 840760-1     |
|                             | <i>Cucurbita pepo</i> L.                        | 292416-1     |
| Chemical compounds detected | Polyphenols (µg/mL)                             | 26195        |
|                             | Tocopherols (ng/mL)                             | 135821       |
|                             | Sterols (µg/mL)                                 | 15889        |

\*Traits in reference to the ontology ATOL: <https://www.atol-o.com/en/atol-2/>; \*\*Traits in reference to the ontology

AHOL: <https://www.atol-ontology.com/ahol/>; \*\*\* Ontology for Parasite Life cycle:

[http://wiki.aiisc.ai/index.php/Ontology\\_for\\_Parasite\\_Life\\_Cycle](http://wiki.aiisc.ai/index.php/Ontology_for_Parasite_Life_Cycle); \*\*\*\* International Plant Names Index-IPNI

: <https://www.ipni.org/p/3>; \*\*\*\*\* Chemical Entities of Biological Interest-ChEBI: <https://www.ebi.ac.uk/chebi/>.
